# Supplementary material
Source: PubMed Central journal article supplement (PMC9936347)

## Supplementary Online Content

Lee LYW, Tilby M, Starkey T, et al; UK COVID Cancer Programme. Association of SARS-CoV-2 spike protein antibody vaccine response with infection severity in patients with cancer: a national COVID cancer cross-sectional evaluation. *JAMA Oncol*. Published online December 22, 2022. doi:10.1001/jamaoncol.2022.5974

**eTable 1.** Coronavirus (COVS) Antibody Responses in the Cancer Cohort and Population Control

**eTable 2.** Coronavirus (COVS) Antibody Titres in the Cancer Cohort and Population Control Following Dose 2, Dose 3, and Following Either Dose 2/3

**eTable 3.** Cancer Cohort Subgroup Analyses of Median Coronavirus (COVS) Antibody Titres and Responses

**eTable 4.** Univariable and Multivariable Adjusted Odds Ratio for the Risk of Coronavirus Breakthrough Infection and Coronavirus Hospitalisation Amongst Test From Cancer Patients With Undetectable Coronavirus (COVS) Antibody Responses Relative to Those With Positive Antibody Responses

**eFigure 1.** Study Eligibility Based on Exclusion Criteria

**eFigure 2.** Median Coronavirus Antibody Titres and Responses in Cancer Patients Based on Cancer and Treatment

This supplementary material has been provided by the authors to give readers additional information about their work.

**eTable 1.** Coronavirus (COVS) antibody responses in the cancer cohort and population control.

|                     | <b>Cancer Cohort (n=4249)</b> | <b>Population Control (n=294,230)</b> |
|---------------------|-------------------------------|---------------------------------------|
| - COVS Negative     | 199 (4.7)                     | 376 (0.1)                             |
| - COVS Positive     | 4050 (95.3)                   | 293854 (99.9)                         |
| - COVS Median (all) | 10176.0 (1388.0-25000.0)      | 14518.0 (4057.0-25000.0)              |

**eTable 2.** Coronavirus (COVS) antibody titres in the cancer cohort and population control following dose 2, dose 3, and following either dose 2/3.

|            | <b>Cancer Cohort</b> |                                | <b>Population Control</b> |                                |
|------------|----------------------|--------------------------------|---------------------------|--------------------------------|
|            | <i>Total</i>         | <i>COVS Median Titre (IQR)</i> | <i>Total</i>              | <i>COVS Median Titre (IQR)</i> |
| Dose 2     | 2313                 | 8765.0 (1093.0-25000.0)        | 230417                    | 12126.0 (2766.0-25000.0)       |
| Dose 3     | 1936                 | 11146.5 (2278.8-25000.0)       | 63813                     | 23667.0 (12875.5-25000.0)      |
| Dose 2 & 3 | 4249                 | 10176.0 (1388.0-25000.0)       | 294230                    | 14518.0 (4057.0-25000.0)       |

**eTable 3.** Cancer cohort subgroup analyses of median coronavirus (COVS) antibody titres and responses.

|                                                           | Dose 2                   | Dose 3                    | Dose 2 & 3               |
|-----------------------------------------------------------|--------------------------|---------------------------|--------------------------|
| <b>Cancer Stage</b>                                       |                          |                           |                          |
| <i>Stage 1</i>                                            | 535 (100.00)             | 235 (100.00)              | 770 (100.00)             |
| - COVS Positive                                           | 535 (100.00)             | 231 (98.30)               | 766 (99.48)              |
| - COVS Negative                                           | 0 (0.00)                 | 4 (1.70)                  | 4 (0.52)                 |
| - COVS Median                                             | 15255.0 (2995.5-25000.0) | 24583.0 (10431.0-25000.0) | 18250.0 (5078.8-25000.0) |
| <i>Stage 2</i>                                            | 341 (100.00)             | 181 (100.00)              | 522 (100.00)             |
| - COVS Positive                                           | 339 (99.41)              | 180 (99.45)               | 519 (99.43)              |
| - COVS Negative                                           | 2 (0.59)                 | 1 (0.55)                  | 3 (0.57)                 |
| - COVS Median                                             | 13908.0 (2769.0-25000.0) | 18768.0 (8298.0-25000.0)  | 15891.0 (4157.0-25000.0) |
| <i>Stage 3</i>                                            | 246 (100.00)             | 130 (100.00)              | 376 (100.00)             |
| - COVS Positive                                           | 245 (99.59)              | 128 (98.46)               | 373 (99.20)              |
| - COVS Negative                                           | 1 (0.41)                 | 2 (1.54)                  | 3 (0.80)                 |
| - COVS Median                                             | 14934.0 (3123.3-25000.0) | 20114.0 (6296.0-25000.0)  | 18028.0 (3650.8-25000.0) |
| <i>Stage 4</i>                                            | 61 (100.00)              | 59 (100.00)               | 120 (100.00)             |
| - COVS Positive                                           | 61 (100.00)              | 59 (100.00)               | 120 (100.00)             |
| - COVS Negative                                           | 0 (0.00)                 | 0 (0.00)                  | 0 (0.00)                 |
| - COVS Median                                             | 8069.0 (579.0-25000.0)   | 16821.0 (4429.5-25000.0)  | 11914.5 (2154.5-25000.0) |
| <b>Cancer Treatment</b>                                   |                          |                           |                          |
| <i>Systemic Anti-Cancer Therapy (SACT)</i>                | 416 (100.00)             | 382 (100.00)              | 798 (100.00)             |
| - COVS Positive                                           | 387 (93.03)              | 336 (87.96)               | 723 (90.60)              |
| - COVS Negative                                           | 29 (6.97)                | 46 (12.04)                | 75 (9.40)                |
| - COVS Median                                             | 6273.0 (369.9-25000.0)   | 10395.0 (1486.0-25000.0)  | 8131.0 (568.0-25000.0)   |
| <i>No Systemic Anti-Cancer Therapy (SACT)</i>             | 1661 (100.00)            | 878 (100.00)              | 2539 (100.00)            |
| - COVS Positive                                           | 1648 (99.22)             | 851 (96.92)               | 2499 (98.42)             |
| - COVS Negative                                           | 13 (0.78)                | 27 (3.08)                 | 40 (1.58)                |
| - COVS Median                                             | 13213.0 (2032.0-25000.0) | 19525.5 (7865.3-25000.0)  | 15443.0 (3323.5-25000.0) |
| <i>Radiotherapy</i>                                       | 314 (100.00)             | 173 (100.00)              | 487 (100.00)             |
| - COVS Positive                                           | 309 (98.41)              | 169 (97.69)               | 478 (98.15)              |
| - COVS Negative                                           | 5 (1.59)                 | 4 (2.31)                  | 9 (1.85)                 |
| - COVS Median                                             | 12943.5 (2233.8-25000.0) | 17391.0 (5191.0-25000.0)  | 14520.0 (2953.0-25000.0) |
| <i>No Radiotherapy</i>                                    | 1763 (100.00)            | 1087 (100.00)             | 2850 (100.00)            |
| - COVS Positive                                           | 1726 (97.90)             | 1018 (93.65)              | 2744 (96.28)             |
| - COVS Negative                                           | 37 (2.10)                | 69 (6.35)                 | 106 (3.72)               |
| - COVS Median                                             | 11553.0 (1554.0-25000.0) | 16937.0 (5110.0-25000.0)  | 13645.0 (2299.5-25000.0) |
| <b>Cancer Type</b>                                        |                          |                           |                          |
| <i>Solid Tumour Malignancy</i>                            | 1847 (100.00)            | 944 (100.00)              | 2791 (100.00)            |
| - COVS Positive                                           | 1843 (99.78)             | 938 (99.36)               | 2781 (99.64)             |
| - COVS Negative                                           | 4 (0.22)                 | 6 (0.64)                  | 10 (0.36)                |
| - COVS Median                                             | 13511.0 (2310.0-25000.0) | 20649.5 (9413.0-25000.0)  | 16165.0 (3906.0-25000.0) |
| <i>Haematological Malignancy</i>                          | 230 (100.00)             | 316 (100.00)              | 546 (100.00)             |
| - COVS Positive                                           | 192 (83.48)              | 249 (78.80)               | 441 (80.77)              |
| - COVS Negative                                           | 38 (16.52)               | 67 (21.20)                | 105 (19.23)              |
| - COVS Median                                             | 1004.5 (19.0-12485.0)    | 4297.0 (11.4-18206.0)     | 1872.5 (12.8-16772.0)    |
| <b>Solid Tumour Subtypes</b>                              |                          |                           |                          |
| <i>Lip, oral cavity and pharynx (C00-C14)</i>             | 55 (100.00)              | 30 (100.00)               | 85 (100.00)              |
| - COVS Positive                                           | 55 (100.00)              | 30 (100.00)               | 85 (100.00)              |
| - COVS Negative                                           | 0 (0.00)                 | 0 (0.00)                  | 0 (0.00)                 |
| - COVS Median                                             | 14031.0 (2456.5-25000.0) | 25000.0 (20288.8-25000.0) | 21290.0 (6207.0-25000.0) |
| <i>Non-colorectal gastrointestinal (C15-C17, C22-C26)</i> | 69 (100.00)              | 34 (100.00)               | 103 (100.00)             |
| - COVS Positive                                           | 69 (100.00)              | 34 (100.00)               | 103 (100.00)             |
| - COVS Negative                                           | 0 (0.00)                 | 0 (0.00)                  | 0 (0.00)                 |
| - COVS Median                                             | 14240.0 (2533.0-25000.0) | 17698.5 (6586.0-25000.0)  | 17558.0 (2992.5-25000.0) |
| <i>Colorectal gastrointestinal (C18-C21)</i>              | 218 (100.00)             | 132 (100.00)              | 350 (100.00)             |
| - COVS Positive                                           | 218 (100.00)             | 131 (99.24)               | 349 (99.71)              |
| - COVS Negative                                           | 0 (0.00)                 | 1 (0.76)                  | 1 (0.29)                 |
| - COVS Median                                             | 15121.0 (2645.5-25000.0) | 19071.5 (7605.8-25000.0)  | 17179.0 (3887.8-25000.0) |
| <i>Respiratory and intrathoracic (C30-C39)</i>            | 67 (100.00)              | 45 (100.00)               | 112 (100.00)             |
| - COVS Positive                                           | 65 (97.01)               | 45 (100.00)               | 110 (98.21)              |
| - COVS Negative                                           | 2 (2.99)                 | 0 (0.00)                  | 2 (1.79)                 |
| - COVS Median                                             | 8487.0 (1361.0-25000.0)  | 25000.0 (15921.0-25000.0) | 18149.5 (5986.5-25000.0) |

|                                                             | Dose 2                   | Dose 3                    | Dose 2 & 3               |
|-------------------------------------------------------------|--------------------------|---------------------------|--------------------------|
| <i>Bone, mesothelial and soft tissue (C40-C41, C45-C49)</i> | 20 (100.00)              | 14 (100.00)               | 34 (100.00)              |
| - COVS Positive                                             | 20 (100.00)              | 14 (100.00)               | 34 (100.00)              |
| - COVS Negative                                             | 0 (0.00)                 | 0 (0.00)                  | 0 (0.00)                 |
| - COVS Median                                               | 11912.0 (1102.8-25000.0) | 18472.0 (8094.3-25000.0)  | 16371.5 (3287.0-25000.0) |
| <i>Breast (C50)</i>                                         | 678 (100.00)             | 346 (100.00)              | 1024 (100.00)            |
| - COVS Positive                                             | 676 (99.71)              | 344 (99.42)               | 1020 (99.61)             |
| - COVS Negative                                             | 2 (0.29)                 | 2 (0.58)                  | 4 (0.39)                 |
| - COVS Median                                               | 12723.5 (1993.3-25000.0) | 19243.5 (7722.5-25000.0)  | 14557.5 (3324.8-25000.0) |
| <i>Female gynaecological (C51-C58)</i>                      | 138 (100.00)             | 56 (100.00)               | 194 (100.00)             |
| - COVS Positive                                             | 138 (100.00)             | 56 (100.00)               | 194 (100.00)             |
| - COVS Negative                                             | 0 (0.00)                 | 0 (0.00)                  | 0 (0.00)                 |
| - COVS Median                                               | 10906.0 (2376.5-25000.0) | 16222.5 (7065.0-25000.0)  | 12341.5 (2968.0-25000.0) |
| <i>Male urological (C60, C62-C63)</i>                       | 23 (100.00)              | 10 (100.00)               | 33 (100.00)              |
| - COVS Positive                                             | 23 (100.00)              | 10 (100.00)               | 33 (100.00)              |
| - COVS Negative                                             | 0 (0.00)                 | 0 (0.00)                  | 0 (0.00)                 |
| - COVS Median                                               | 13474.0 (3665.0-25000.0) | 24891.0 (17112.8-25000.0) | 20913.0 (4268.0-25000.0) |
| <i>Prostate (C61)</i>                                       | 396 (100.00)             | 177 (100.00)              | 573 (100.00)             |
| - COVS Positive                                             | 396 (100.00)             | 175 (98.87)               | 571 (99.65)              |
| - COVS Negative                                             | 0 (0.00)                 | 2 (1.13)                  | 2 (0.35)                 |
| - COVS Median                                               | 16067.0 (2829.8-25000.0) | 24583.0 (11989.0-25000.0) | 19680.0 (4539.0-25000.0) |
| <i>Urinary Tract (C64-C68)</i>                              | 106 (100.00)             | 68 (100.00)               | 174 (100.00)             |
| - COVS Positive                                             | 106 (100.00)             | 67 (98.53)                | 173 (99.43)              |
| - COVS Negative                                             | 0 (0.00)                 | 1 (1.47)                  | 1 (0.57)                 |
| - COVS Median                                               | 17166.5 (2827.8-25000.0) | 25000.0 (9927.0-25000.0)  | 19140.5 (5780.3-25000.0) |
| <i>Central nervous system (C69-C72)</i>                     | 29 (100.00)              | 7 (100.00)                | 36 (100.00)              |
| - COVS Positive                                             | 29 (100.00)              | 7 (100.00)                | 36 (100.00)              |
| - COVS Negative                                             | 0 (0.00)                 | 0 (0.00)                  | 0 (0.00)                 |
| - COVS Median                                               | 11997.0 (1666.0-18353.0) | 10913.0 (7181.0-23361.5)  | 11942.5 (2065.3-21139.5) |
| <i>Endocrine glands (C73-C75)</i>                           | 48 (100.00)              | 25 (100.00)               | 73 (100.00)              |
| - COVS Positive                                             | 48 (100.00)              | 25 (100.00)               | 73 (100.00)              |
| - COVS Negative                                             | 0 (0.00)                 | 0 (0.00)                  | 0 (0.00)                 |
| - COVS Median                                               | 12501.5 (1809.5-25000.0) | 17828.0 (9296.0-25000.0)  | 15066.0 (4327.0-25000.0) |
| <b>Haematological Subtypes</b>                              |                          |                           |                          |
| <i>Lymphoma (C81-C85)</i>                                   | 125 (100.00)             | 153 (100.00)              | 278 (100.00)             |
| - COVS Positive                                             | 103 (82.40)              | 105 (68.63)               | 208 (74.82)              |
| - COVS Negative                                             | 22 (17.60)               | 48 (31.37)                | 70 (25.18)               |
| - COVS Median                                               | 736.0 (6.0-17740.0)      | 799.0 (0.4-9918.0)        | 777.5 (0.7-11638.0)      |
| <i>Myeloma (C90)</i>                                        | 33 (100.00)              | 60 (100.00)               | 93 (100.00)              |
| - COVS Positive                                             | 32 (96.97)               | 59 (98.33)                | 91 (97.85)               |
| - COVS Negative                                             | 1 (3.03)                 | 1 (1.67)                  | 2 (2.15)                 |
| - COVS Median                                               | 5617.0 (849.0-23768.0)   | 16124.5 (4272.0-25000.0)  | 10451.0 (2328.0-25000.0) |
| <i>Leukaemia (C91-C95)</i>                                  | 66 (100.00)              | 91 (100.00)               | 157 (100.00)             |
| - COVS Positive                                             | 52 (78.79)               | 76 (83.52)                | 128 (81.53)              |
| - COVS Negative                                             | 14 (21.21)               | 15 (16.48)                | 29 (18.47)               |
| - COVS Median                                               | 631.6 (9.5-3563.3)       | 5100.0 (137.3-18361.5)    | 1846.0 (40.0-11385.0)    |

**eTable 4.** Univariable and multivariable adjusted odds ratio for the risk of coronavirus breakthrough infection and coronavirus hospitalisation amongst test from cancer patients with undetectable coronavirus (COVS) antibody responses relative to those with positive antibody responses. Multivariable corrected models were fitted for the patient age, sex, ethnicity and deprivation. Sensitivity analyses were done according to number of vaccine doses and on cancer type.

|                               | Coronavirus Breakthrough infection |          |                              |         | Coronavirus Hospitalisation |          |                              |         |
|-------------------------------|------------------------------------|----------|------------------------------|---------|-----------------------------|----------|------------------------------|---------|
|                               | Univariable OR<br>(95% CI)         | p. value | Multivariable OR<br>(95% CI) | p.value | Univariable OR<br>(95% CI)  | p. value | Multivariable OR<br>(95% CI) | p.value |
| <b>Overall</b>                | 2.56 (1.69-.400)                   | <0.0001  | 3.05 (1.96-4.72)             | <0.0001 | 5.88 (3.13-11.11)           | <0.0001  | 6.48 (3.31-6.48)             | <0.0001 |
| <b>Sensitivity analysis 1</b> |                                    |          |                              |         |                             |          |                              |         |
| - Dose 2 only                 | 2.17 (0.97-4.76)                   | 0.0580   | 2.25 (0.99-5.12)             | 0.0532  | 6.67 (2.27-20.00)           | 0.0006   | 6.71 (2.21-20.35)            | 0.0007  |
| - Dose 3 only                 | 2.56 (1.54-4.35)                   | 0.0003   | 3.16 (1.86-5.37)             | <0.0001 | 5.26 (2.27-12.0)            | 0.0001   | 6.28 (2.63-14.99)            | <0.0001 |
| <b>Sensitivity analysis 2</b> |                                    |          |                              |         |                             |          |                              |         |
| - Solid only                  | 5.88 (1.25-25.00)                  | 0.0250   | 5.33 (1.05-27.06)            | 0.0436  | 50.00 (9.09-inf)            | <0.0001  | 50.50 (9.13-279.19)          | <0.0001 |
| - Haem only                   | 1.59 (0.85-3.03)                   | 0.1470   | 2.04 (1.04-3.98)             | 0.0376  | 3.23 (1.27-8.33)            | 0.0137   | 3.64 (1.35-9181)             | 0.0106  |

**eFigure 1.** Study eligibility based on exclusion criteria.

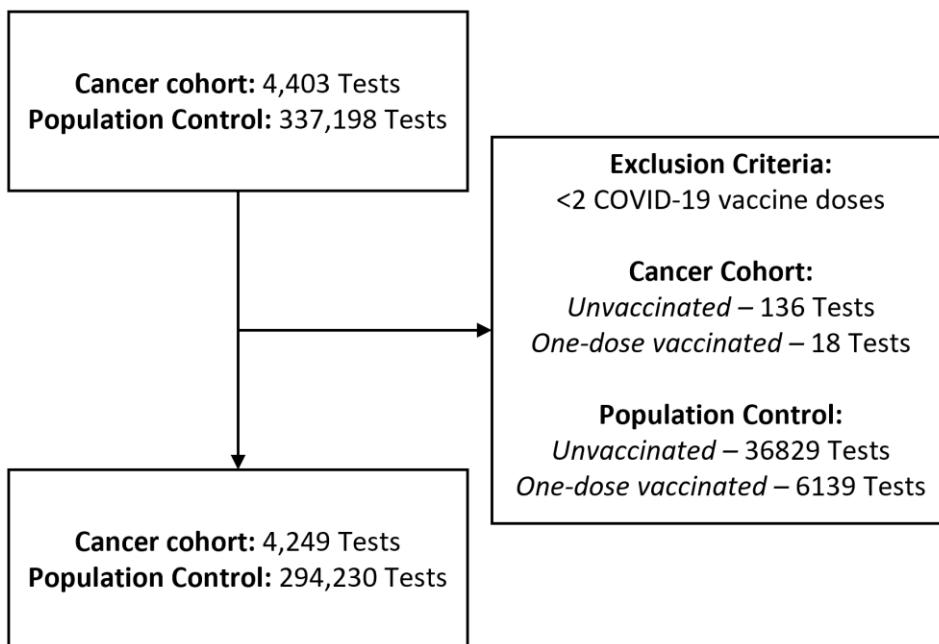

**eFigure 2.** Median coronavirus antibody titres and responses in cancer patients based on cancer and treatment. Bars represent % COVS positive results, dots represent antibody response titres (COVS/U/ml).

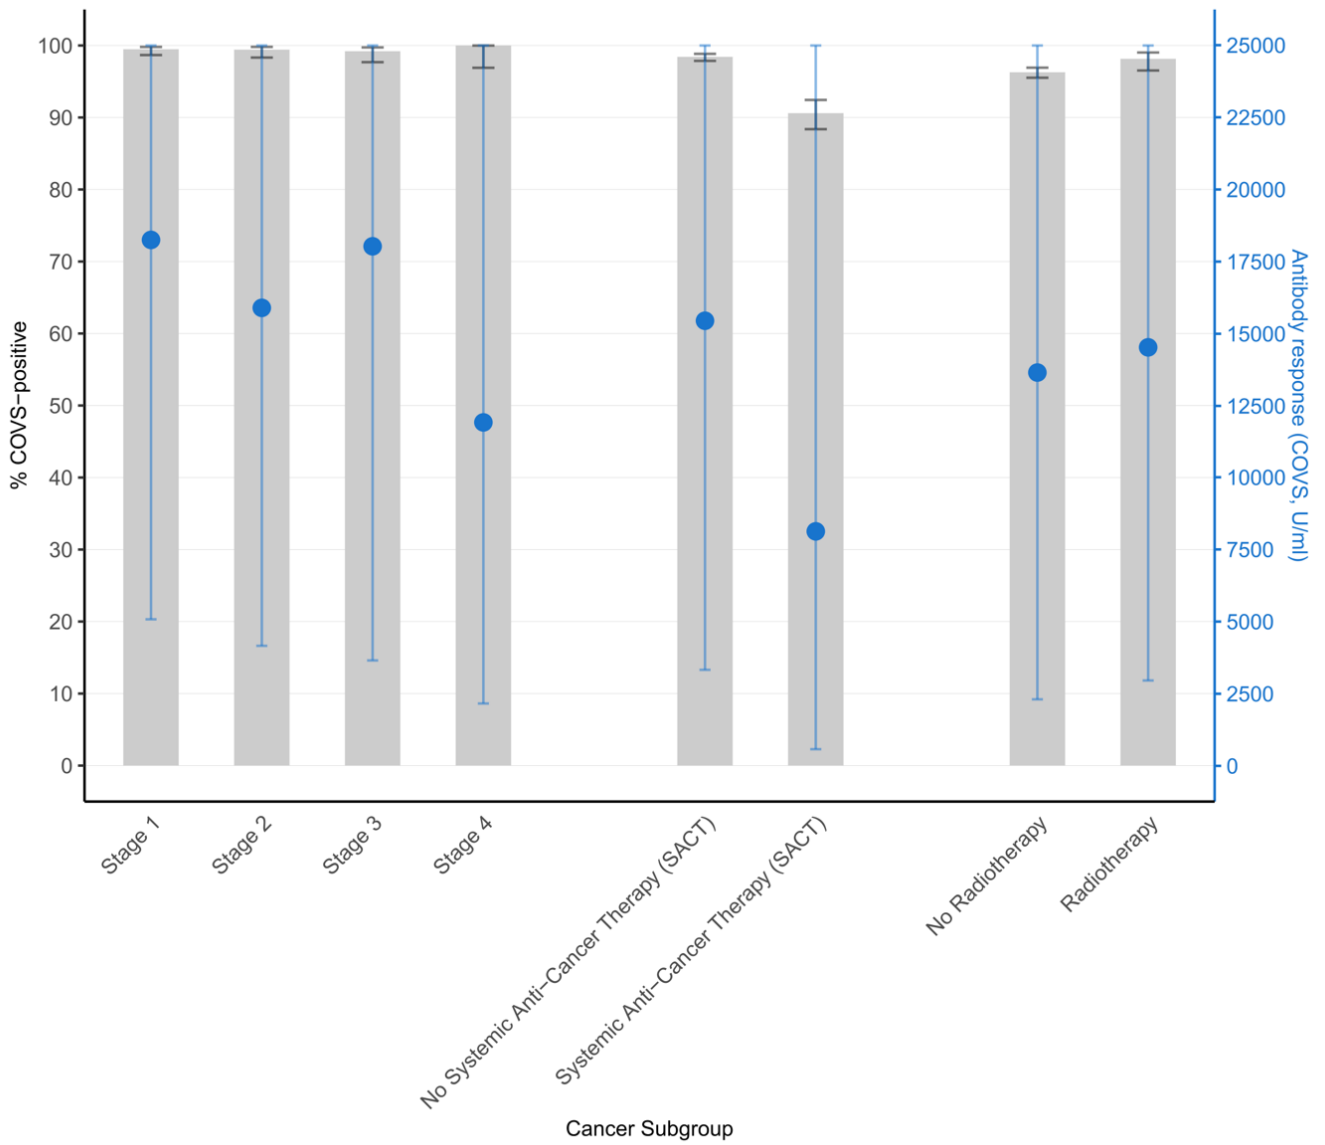

Supplement: jamaoncol-e225974-s001.pdf [file jamaoncol-e225974-s001.pdf]
