# Supplementary material
Source: PubMed Central journal article supplement (PMC9936347)
Supplement: jamaoncol-e225974-s002.pdf [file jamaoncol-e225974-s002.pdf]

Supplemental Online Content: Nonauthor Collaborators

\*First name, last name, and suffix (if applicable) are required and will appear in PubMed.

| <b>*Group Name(s): UK COVID Cancer Programme</b> |                   |                              |                  |             |                                          |                                                         |                                                                                            |
|--------------------------------------------------|-------------------|------------------------------|------------------|-------------|------------------------------------------|---------------------------------------------------------|--------------------------------------------------------------------------------------------|
| <b>*First Name and Middle Initial(s)</b>         | <b>*Last Name</b> | <b>*Suffix (eg, Jr, III)</b> | Academic Degrees | Institution | Location (city, state/province, country) | Role or Contribution, eg, chair, principal investigator | Group (if more than 1 Group listed in the byline) and/or Subgroup (eg, Steering Committee) |
| Emma                                             | Kinloch           | Ms                           |                  |             |                                          |                                                         |                                                                                            |
| Emily                                            | Lam               | Ms                           |                  |             |                                          |                                                         |                                                                                            |
| Gillian                                          | Murphy            | Ms                           |                  |             |                                          |                                                         |                                                                                            |
| Malcolm                                          | Rhodes            | Mr                           |                  |             |                                          |                                                         |                                                                                            |
| Kate                                             | Robinson          | Ms                           |                  |             |                                          |                                                         |                                                                                            |
| Sanskriti                                        | Swarup            | Ms                           |                  |             |                                          |                                                         |                                                                                            |
| Keeley                                           | Bernhardt         | Ms                           |                  |             |                                          |                                                         |                                                                                            |
| Jola                                             | Bytyci            | Ms                           |                  |             |                                          |                                                         |                                                                                            |
| Yuxin                                            | Ying              | Ms                           |                  |             |                                          |                                                         |                                                                                            |
| Sukhmunni                                        | Johal             | Ms                           |                  |             |                                          |                                                         |                                                                                            |
| Remarez                                          | Sheehan           | Mr                           |                  |             |                                          |                                                         |                                                                                            |
